# Supplementary material
Source: MDPI journal article supplement (https://www.mdpi.com/2076-3263/9/3/134)
Supplement: s1 [file s1]

## Sheet: Foglio1
	Isotopic data
Outcrop	Sample	d13C (‰ V-PDB)	d18O (‰ V-PDB)
S Vernicio	RG860a	-33.2	3.6
	RG860b	-30.1	2.9
Case Buscarelle	RG863a	-36.4	1.5
	RG863a	-35.1	-0.3
Poggio Campane	PC2	-32.2	2.2
Lame-Rontana	LAM A1	-27.4	0.4
	LAM A2	-48.3	4.6
	LAM A3	-51	3.6
	LAM D1	-31.3	-1.1
	RON A1	-28.8	1.7
	RON A2	-29	4.6
	RON A3	-34.2	4
	RON A4	-49.7	3.7
	RON A5	-46	4.8
	RON A6	-33.4	2.3
	RON Ab1	-33.7	4.5
	RON Ab2	-45	0.8
	RON Ab3	-51.7	2.8
	RON Ab4	-42	-1.6
	RON Ab5	-44.7	5
	RON C1	-33.4	1.14
	RON D1	-44.8	4.4
	RON S11-1	-39.4	4.2
Colline-Mondera	COL Ab-1	-39.4	1.7
	COL C-1	-50.8	1.2
	Colline1	-42.3	1.3
	Colline2	-56.2	1.9
	MG11a	-39.7	0.6
	MG11b	-49.8	0.9
	COL4a	-38.9	3.5
